# Supplementary material
Source: PubMed Central journal article supplement (PMC2700895)
Supplement: 0901877106_0901877106SI.pdf [file 0901877106_0901877106SI.pdf]

# Supporting Information

Wirnsberger et al. 10.1073/pnas.0901877106

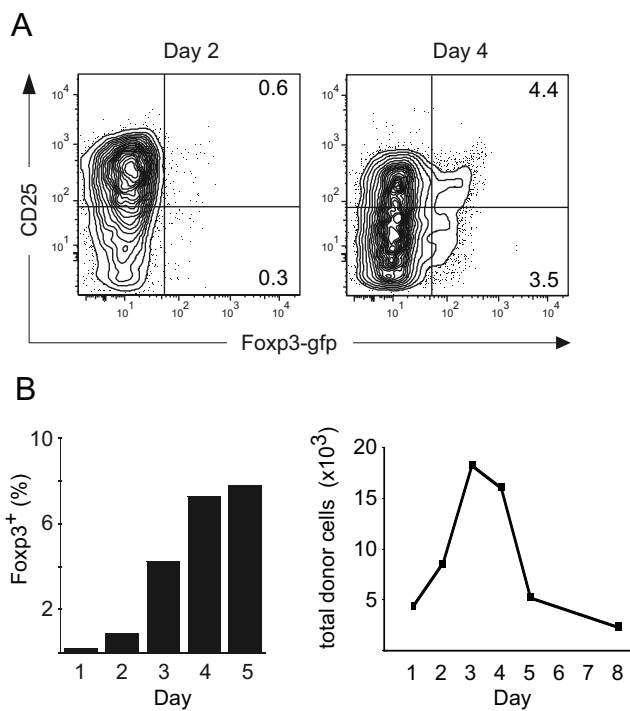

**Fig. S1.** DO11.10<sup>+</sup> CD4 SP cells give rise to T<sub>reg</sub> after intrathymic injection into AIRE-HCO recipient mice. (A) CD4 SP thymocytes cells from CD45.1 DO11.10 Rag<sup>o/o</sup> Foxp3-gfp mice were i.t. transferred into AIRE-HCO mice and analyzed for Foxp3-gfp and CD25 expression at the indicated time points after injection. Numbers indicate the frequency of cells within the respective quadrants. (B) Kinetics of intrathymic T<sub>reg</sub> development. The diagram depicts the percentage of Foxp3<sup>+</sup> cells (Left) or absolute numbers of total donor cells (Right) that were recovered at the indicated time points after i.t. injection.



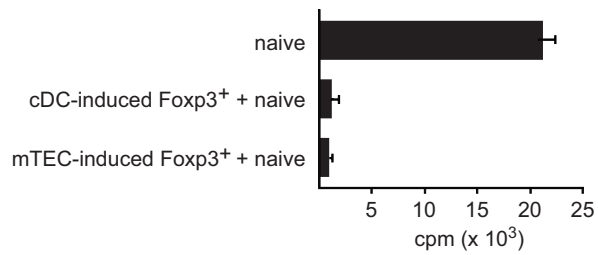

**Fig. S3.** Foxp3<sup>+</sup> cells induced in the presence of mTECs or cDCs are suppressive in vitro. To address the suppressive potential of mTEC- or cDC-induced Foxp3<sup>+</sup> cells,  $2 \times 10^4$  TCR-HA Rag2<sup>fl/o</sup> CD4<sup>+</sup> peripheral cells were cultured alone or together with  $2 \times 10^4$  Foxp3-gfp<sup>+</sup> cells sorted from in vitro T<sub>reg</sub> differentiation assays (as described in Fig. 4) in the presence of syngeneic irradiated splenocytes and HA (107–119) peptide. Proliferation was assessed by scintillation counting after a pulse with [<sup>3</sup>H]thymidine for the last 24 h of a 96-h incubation period. Data are representative of 2 independent experiments.
